# Supplementary material for: Immunodominant B-Cell Linear Epitope on the VP1 P Domain of a Feline Norovirus Cat Model
Source: MDPI journal article supplement (doi:10.3390/pathogens11070731), 2022-06-27
Supplement: s1 [file s1]

```

FNoV_GVI_M81      SFSVPLIVQDMSNSRWPAQINGLVVRGNEAQVVFQNGRCTTEGMLLGTTLTSINSIC
FNoV_GIV_CU081210E *****V*E*****T*****
FNoV_GVI_M49-1    A*L*Q*T*GE*****R*TTMIADPHLP*LRI*****LD*T*M**Q*NP*D**

FNoV_GVI_M81      GLRGLSVS---QASVRGAPALTEEMPPLLEDEVADGAAATYTLARAADTTLWLRVEEPDGR
FNoV_GIV_CU081210E *****--*****
FNoV_GVI_M49-1    RV**YFSNSRP*VMCE*EDDALDQASLGAEPIR*Q*PGLR*Q**STER--*FA*T*LN*Q

FNoV_GVI_M81      PYDIFGDQPAPLGTDPDFTAVIVGTAIRPR---TTSGLYLDHAYVDTPGDADFTPSTGNT
FNoV_GIV_CU081210E *****--*A*****
FNoV_GVI_M49-1    A**P*****V**E*R**ALV*LPGTNP**NSRFE**WI**NN-QTTYA*AA*MV

FNoV_GVI_M81      KIVLRGGSGHVGQGHYWQFKPIAVEGGGHRPQYOEYNLPDYAGPTAS-NHDLAPPVAPR
FNoV_GIV_CU081210E *****R*****S*****
FNoV_GVI_M49-1    A*TTSDDS*SNYANDQVCE*L*LG*DITNST*-N*FD*S*G*SAS*G*RN**T**T

FNoV_GVI_M81      MPGELLLLFEEDMPVWDDGAGAAPAQKIHCLLPNEFITHLFDLQAPALAEALLRYVHPD
FNoV_GIV_CU081210E *****N*****
FNoV_GVI_M49-1    F**IV**G*N**QNRSA*TS-NKE*R*****Y*Q**Y*T**S*SDV**V**IN**

FNoV_GVI_M81      SGRTLFECKLYREGYMVVAAPAGRLNFPDGYFRFDSWVSIFYILSPV
FNoV_GIV_CU081210E *****
FNoV_GVI_M49-1    T**V**A**H*D*F*T*N*S*T-TVL***H*****NQ**A***

```

**Figure S1.** The amino acid sequence alignment of the P domain of VP1 of GIV and GVI FNoVs. The asterisks indicate conserved residues. Red letters indicate the amino acid sequence matching P-10.
